# Supplementary material for: Prostate Cancer Intercellular Communication
Source: Preprints.org preprint supplement (doi:10.20944/preprints202411.0469.v1), 2024-11-08
Supplement: Supplementary file 1 [file supplementary]

**Supplementary figures**


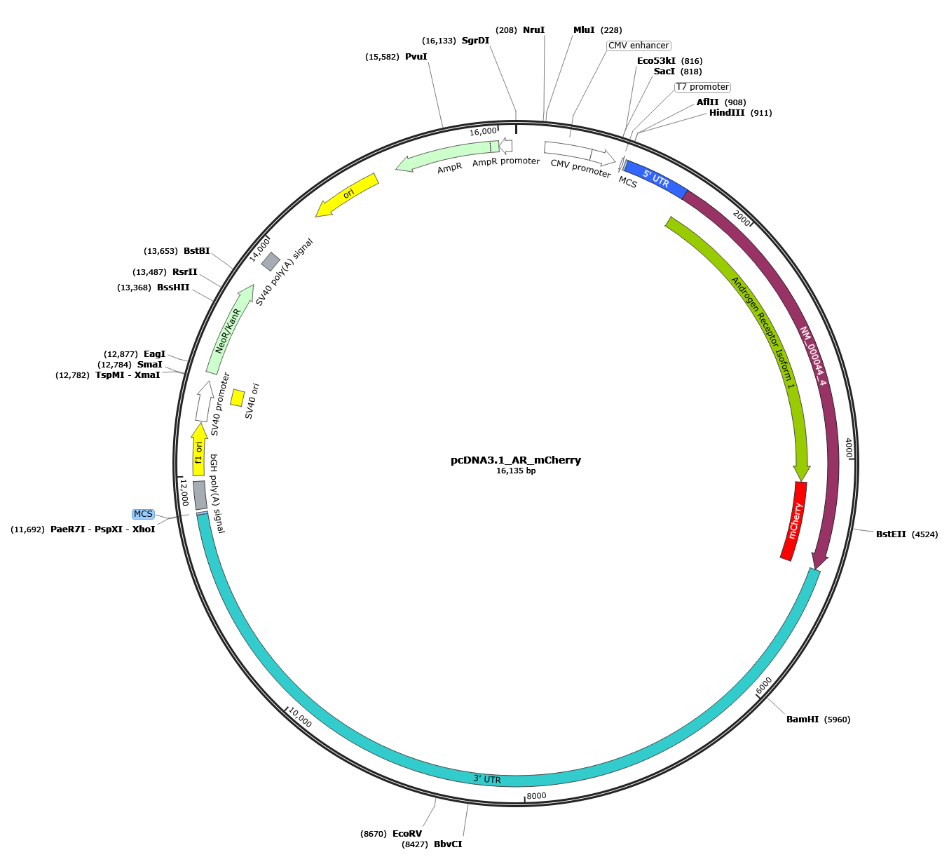
Figure S1. Annotated plasmid DNA gene map for pcDNA3.1_AR-mCherry.

Figure S2. Live cell imaging video of co-cultured 22Rv1 prostate cancer cells differentially labelled with either actin (green) or CellMask™ Plasma Membrane (PM) stain (red).

Figure S3. Live cell imaging video of differentially labelled 22Rv1 cells expressing Lamp1-RFP and actin-GFP co-cultured together.

Figure S4. Live cell imaging video of DU145 cells stained with CellMask™ PM dye showing vesicle budding and TNT connection.


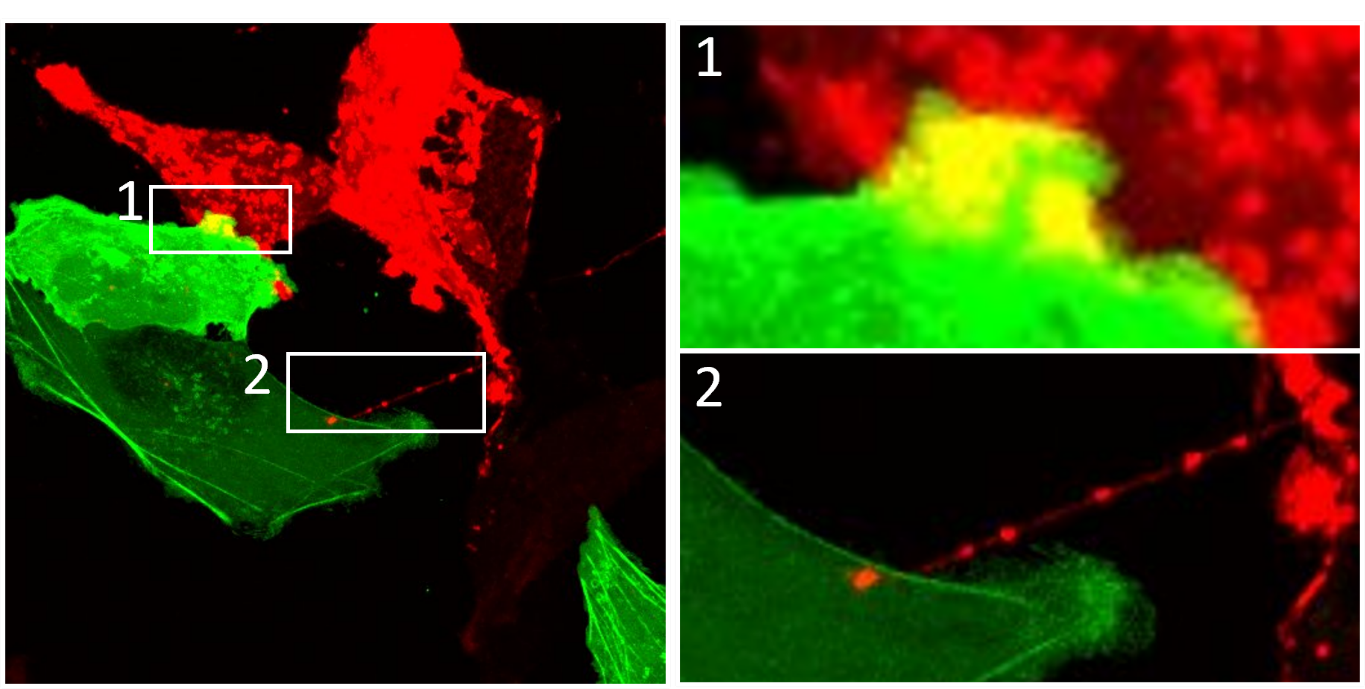


Figure S5. Representative confocal images of LNCaP prostate cancer cells labelled with Lamp1-GFP (green) co-cultured with PNT1a non-malignant cells labelled with Lamp1-RFP (red).

Figure S6. Live cell imaging video of THP-1 macrophages labelled with DiO (green) co-cultured with PC-3 prostate cancer cells labelled with DiD (red).

Figure S7. Live cell imaging video showing 22Rv1 cells expressing fluorescently tagged F-actin and stained with LysoTracker Red.

Figure S8. Live cell imaging video showing 22Rv1 cells expressing fluorescently tagged F-actin and stained with Mitotracker Red.

Figure S9. Live cell imaging video showing 22Rv1 cells expressing fluorescently tagged F-actin and stained with ER tracker Red.

Figure S10. Live cell imaging video showing 22Rv1 cells expressing fluorescently tagged F-actin and stained with BODIPY.


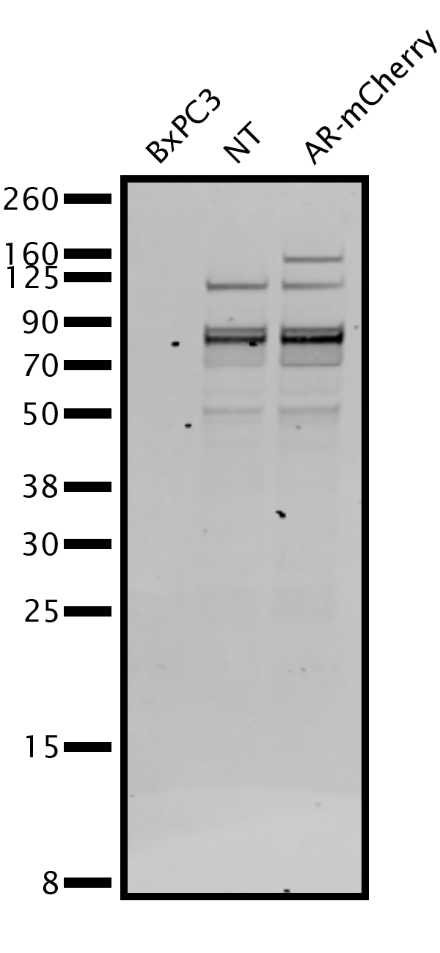


Figure S11. Confirmation of AR expression plasmid construct via western blot of AR in AR negative BXPC-3 pancreatic cell lines, and 22Rv1 prostate cancer cells either non-transfected or transfected with AR-mCherry.


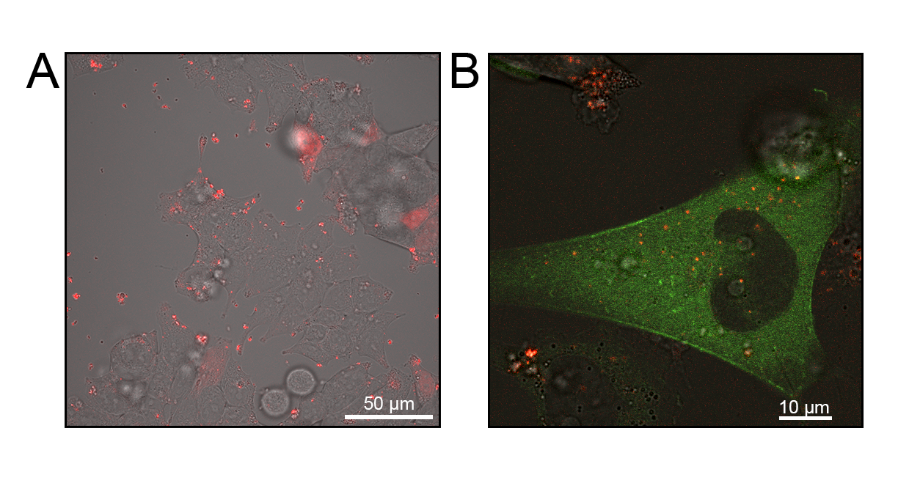


Figure S12. Representative live cell images of (A) AR-mCherry associated with extracellular vesicles in 22Rv1 cells and (B) LNCaP cells expressing AR-mCherry co-cultured with PNT1a cells transfected with actin-GFP.


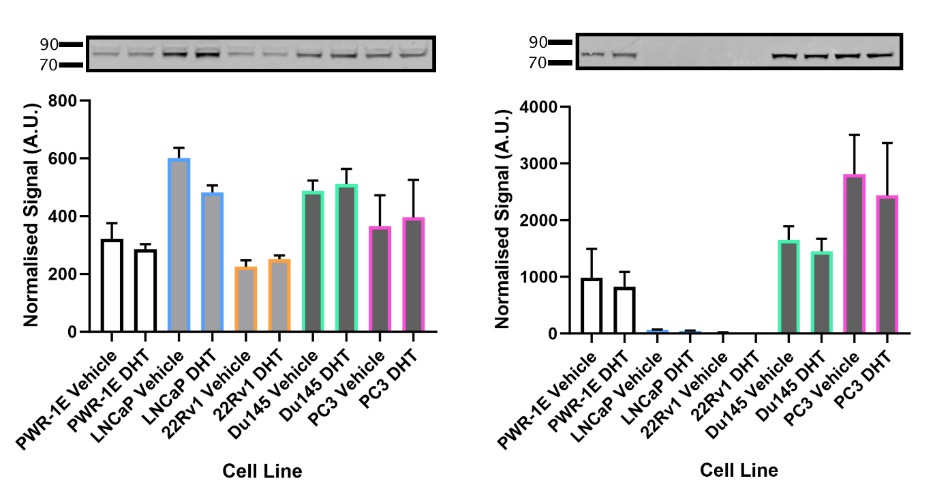


Figure S13. RDX and MSN protein expression are not affected by R1881 treatment. Endogenous Radixin and Moesin protein were detected by Western blot post R1881 treatment and corresponding signal quantified by normalising to total protein stain.
